# Supplementary material for: Synthesis of Ca(OH)2 and Na2CO3 through anion exchange between CaCO3 and NaOH: effect of reaction temperature
Source: Royal Society of Chemistry journal article supplement (doi:10.1039/d2ra05827h), 2022-01-01
Supplement: d2ra05827h1.pdf [file d2ra05827h1.pdf]

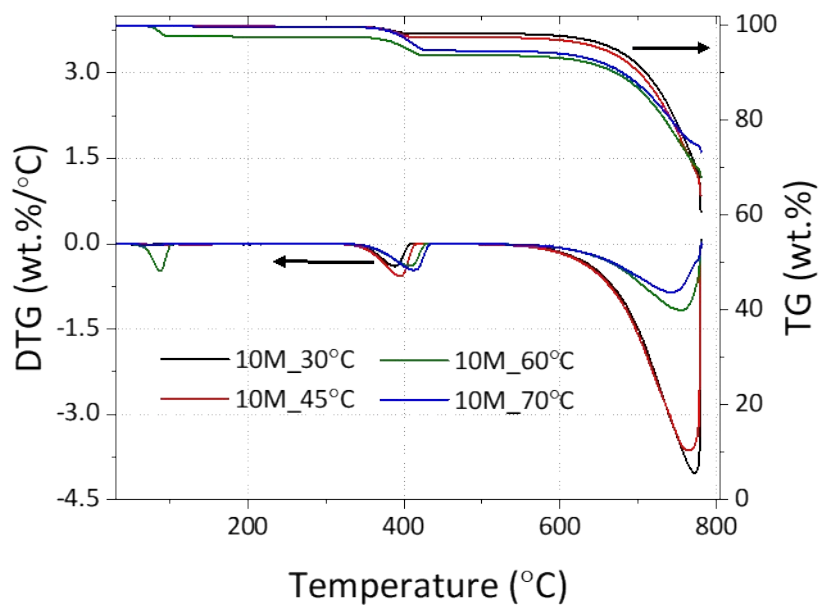

SEI\_I: TG/DTG trends registered for the samples reacted at 30, 45, 60, and 70°C in 10M NaOH solutions.

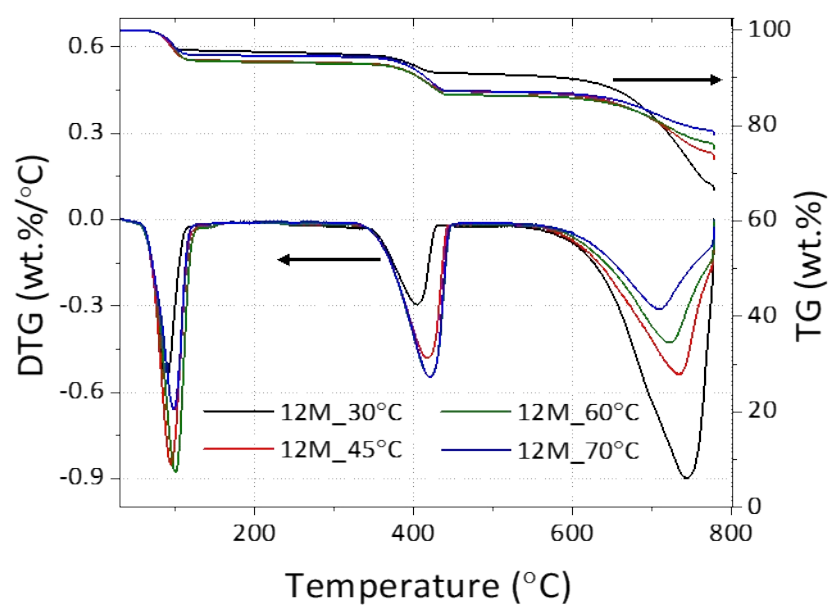

SEI\_II: TG/DTG trends registered for the samples reacted at 30, 45, 60, and 70°C in 12M NaOH solutions.

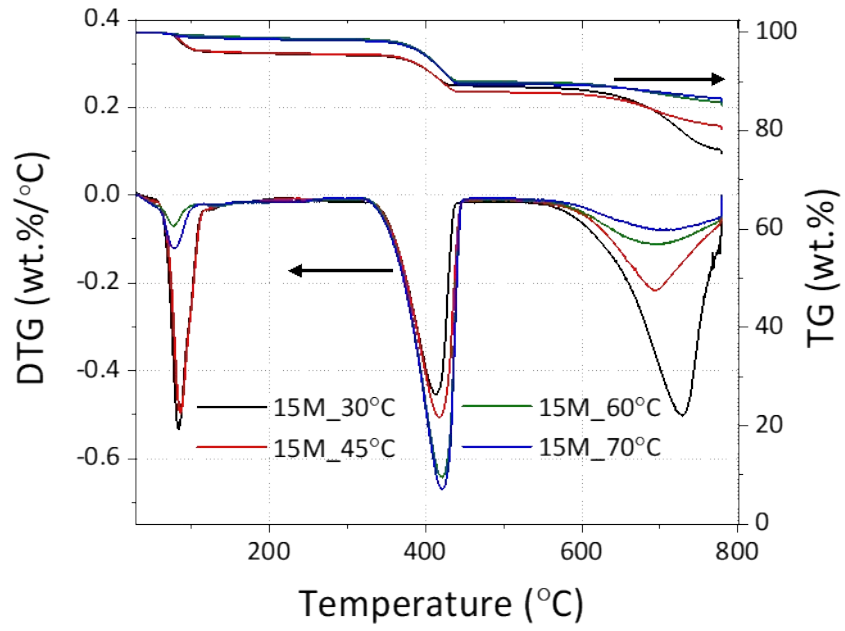

SEI\_III: TG/DTG trends registered for the samples reacted at 30, 45, 60, and 70°C in 15M NaOH solutions.

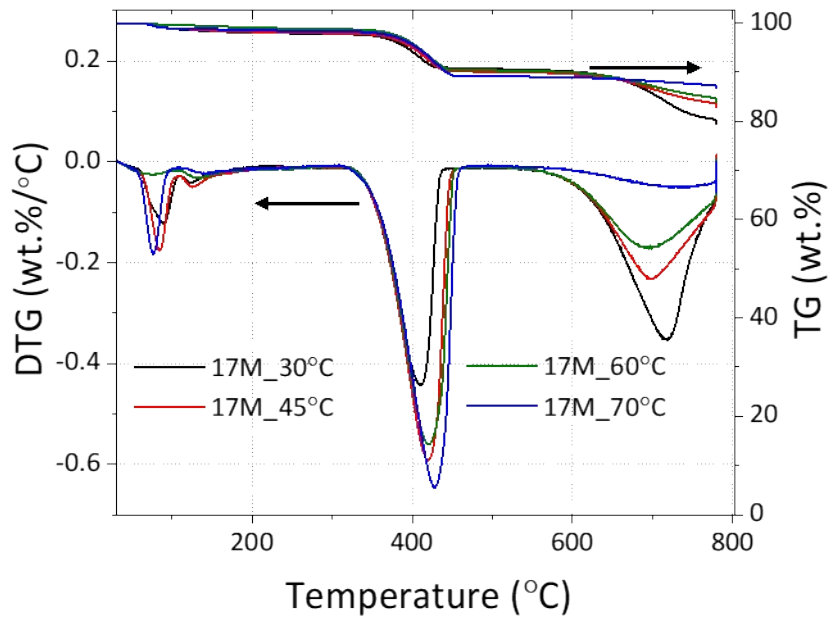

SEI\_IV: TG/DTG trends registered for the samples reacted at 30, 45, 60, and 70°C in 17M NaOH solutions.
